# Supplementary material for: (+)- and (−)-Ascomlactone A: a pair of novel dimeric polyketides from a mangrove endophytic fungus Ascomycota sp. SK2YWS-L
Source: Royal Society of Chemistry journal article supplement (doi:10.1039/c7ob02707a), 2017-01-01

## **SUPPORTING INFORMATION**

**Title:** (+)- and (-)-Ascomlactone A, a pair of Novel Dimeric Polyketides from a Mangrove Endophytic Fungus *Ascomycota* sp. SK2YWS-L

**Author(s):** Zhaoming Liu, Senhua Chen, Pei Qiu, Chunbing Tan, Yuhua Long\*, Yongjun Lu and Zhigang She\*

Table of contents:

**X-ray crystallographic data for asterpenacide A (1)**

**Table S1.** Energy Analysis for the Conformers of **1b**.

**Figure S1.** B3LYP/6-31G(d) optimized low-energy conformers of **1b**.

**Figure S2.** Comparison of the experimental ECD spectra of **1a** and **1b** with the rB3LYP/6-311+g(2d,p) calculated spectrum in MeOH.  $\sigma = 0.26$  eV.

**Figure S3.**  $^1\text{H}$  NMR spectrum of ( $\pm$ )-ascomlactone A in DMSO (600 MHz).

**Figure S4.**  $^{13}\text{C}$  NMR spectrum of ( $\pm$ )-ascomlactone A in DMSO (150 MHz).

**Figure S5.** DEPT-90° spectrum of ( $\pm$ )-ascomlactone A in DMSO (150 MHz).

**Figure S6.** DEPT-135° spectrum of ( $\pm$ )-ascomlactone A in DMSO (150 MHz).

**Figure S7.**  $^1\text{H}$ - $^1\text{H}$  COSY spectrum of ( $\pm$ )-ascomlactone A in DMSO (600 MHz).

**Figure S8.** HSQC spectrum of ( $\pm$ )-ascomlactone A in DMSO (600 MHz).

**Figure S9.** HMBC spectrum of ( $\pm$ )-ascomlactone A in DMSO (600 MHz).

**Figure S10.** HRESI TOF MS spectrum of compound **1**.

**Figure S11.** HPCL spectrum of ( $\pm$ )-ascomlactone A.

**Figure S12.** HPCL chiral separation spectrum of (+)-ascomlactone A (**1a**) and (-)-ascomlactone A (**1b**).

**Figure S13.** LC-MS of the extract of Ascomycota sp. (top), the purified (+)-**1** (middle) and the ESI-MS spectrum of THE peak at RT 4.9 min.

## X-ray crystallographic data for (±)-ascomlactone A

Crystal data and structure refinement for **1** are as follows:

|                                   |                                                                                                                     |
|-----------------------------------|---------------------------------------------------------------------------------------------------------------------|
| Empirical formula                 | C <sub>32</sub> H <sub>26</sub> O <sub>11</sub>                                                                     |
| Formula weight                    | 586.53                                                                                                              |
| Temperature                       | 293(2) K                                                                                                            |
| Wavelength                        | 1.54178 Å                                                                                                           |
| Crystal system                    | Monoclinic                                                                                                          |
| Space group                       | P_1                                                                                                                 |
| Unit cell dimensions              | a= 8.8974(2) Å      α= 102.767(2) °<br>b= 11.2339(2) Å      β= 96.993(2) °<br>c= 15.5141(3) Å      γ= 90.2390(10) ° |
| Volume                            | 1500.26(5) Å <sup>3</sup>                                                                                           |
| Z                                 | 2                                                                                                                   |
| Density (calculated)              | 1.130 Mg/m <sup>3</sup>                                                                                             |
| Absorption coefficient            | 0.832 mm <sup>-1</sup>                                                                                              |
| F(000)                            | 612                                                                                                                 |
| Crystal size                      | 0.35×0.25×0.15 mm <sup>3</sup>                                                                                      |
| Theta range for data collection   | 3.9940 to 73.7430°                                                                                                  |
| Index ranges                      | -11 ≤ h ≤ 11, -14 ≤ k ≤ 14, -19 ≤ l ≤ 18                                                                            |
| Reflections collected             | 43057                                                                                                               |
| Independent reflections           | 6009 [R(int)= 0.052]                                                                                                |
| Completeness to theta = 66.1980°  | 99.0%                                                                                                               |
| Absorption correction             | Semi-empirical from equivalents                                                                                     |
| Max. and min. Transmission        | 1.0000 to 0.6168                                                                                                    |
| Refinement method                 | Full-matrix least-squares on F <sup>2</sup>                                                                         |
| Data / restraints / parameters    | 6009 / 1 / 396                                                                                                      |
| Goodness-of-fit on F <sup>2</sup> | 1.070                                                                                                               |
| Final R indices [I>2σ(I)]         | R1= 0.0623, ωR2= 0.1933                                                                                             |

R indices (all data)

R1= 0.0667,  $\omega$ R2= 0.1977

Data were collected on Agilent Xcalibur Nova single-crystal diffractometer using Cu  $K\alpha$  radiation. The crystal structure was refined by full-matrix least-squares calculation. Crystallographic data for the structure has been deposited in the Cambridge Crystallographic Data Centre (deposition number: CCDC [1570929](https://www.ccdc.cam.ac.uk/CCDC/1570929)). Copies of these data can be obtained free of charge via [www.ccdc.cam.ac.uk/conts/retrieving.html](http://www.ccdc.cam.ac.uk/conts/retrieving.html) (or from the Cambridge Crystallographic Data Centre, 12, Union Road, Cambridge CB21EZ, UK.; fax: (t44) [1223-336-033](tel:+441223336033); or [deposit@ccd.cam.ac.uk](mailto:deposit@ccd.cam.ac.uk)).

**Table S1.** Energy analysis for the Conformers of **1b**.

| compounds | Conformation | G (Hartree)    | G (Kcal/mol) | $\Delta$ G<br>(Kcal/mol) | Boltzmann<br>Dist (%) |
|-----------|--------------|----------------|--------------|--------------------------|-----------------------|
| <b>1b</b> | <b>1b-a</b>  | -2062.50732765 | -1294229.329 | 1.9978                   | 3.13%                 |
|           | <b>1b-b</b>  | -2062.50681352 | -1294229.007 | 2.3204                   | 1.81%                 |
|           | <b>1b-c</b>  | -2062.50630896 | -1294228.69  | 2.6370                   | 1.06%                 |
|           | <b>1b-d</b>  | -2062.50719279 | -1294229.245 | 2.0824                   | 2.71%                 |
|           | <b>1b-e</b>  | -2062.51051138 | -1294231.327 | 0.0000                   | 91.29%                |

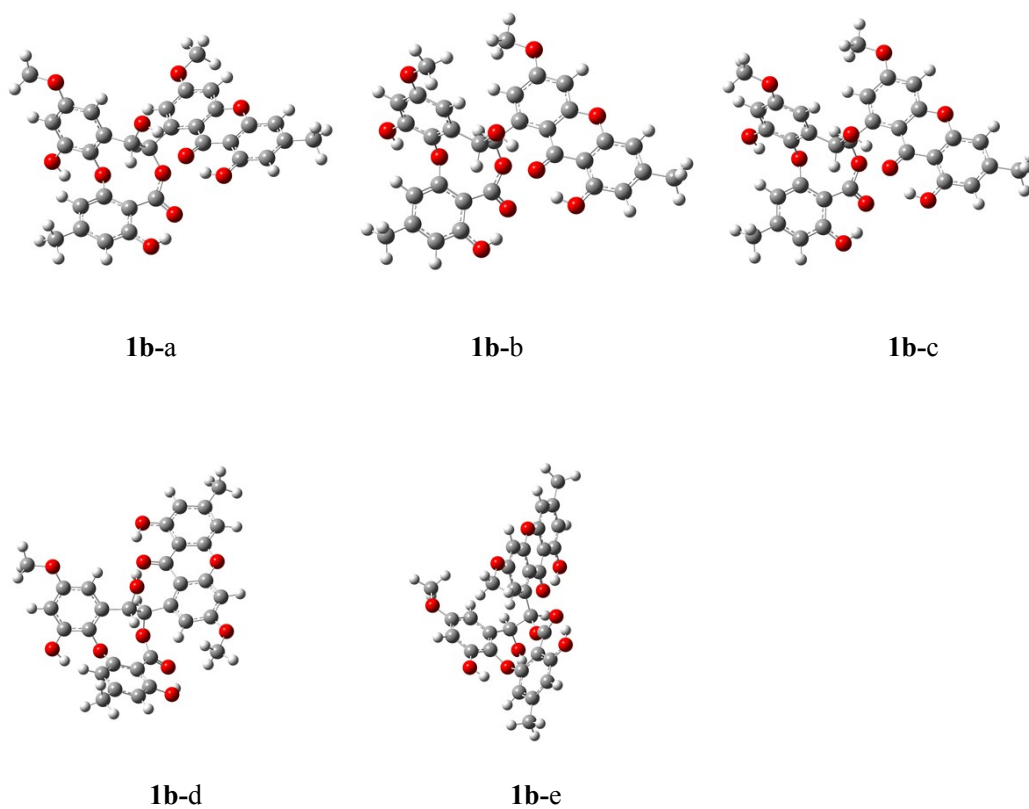

**Figure S1.** B3LYP/6-31G(d) optimized low-energy conformers of **1b**.

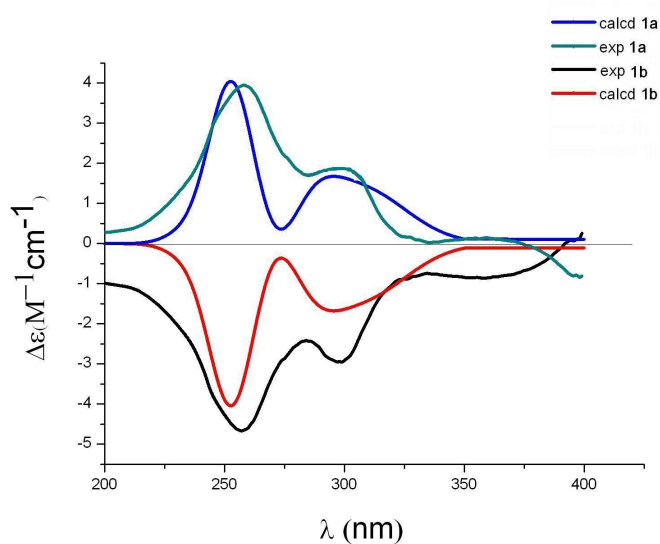

**Figure S2.** Comparison of the experimental ECD spectra of **1a** and **1b** with the B3LYP/6-311+g(2d,p) calculated spectrum in MeOH.  $\sigma = 0.26$  eV.

**Figure S3.**  $^1\text{H}$  NMR spectrum of ( $\pm$ )-ascomlactone A in DMSO (600 MHz).

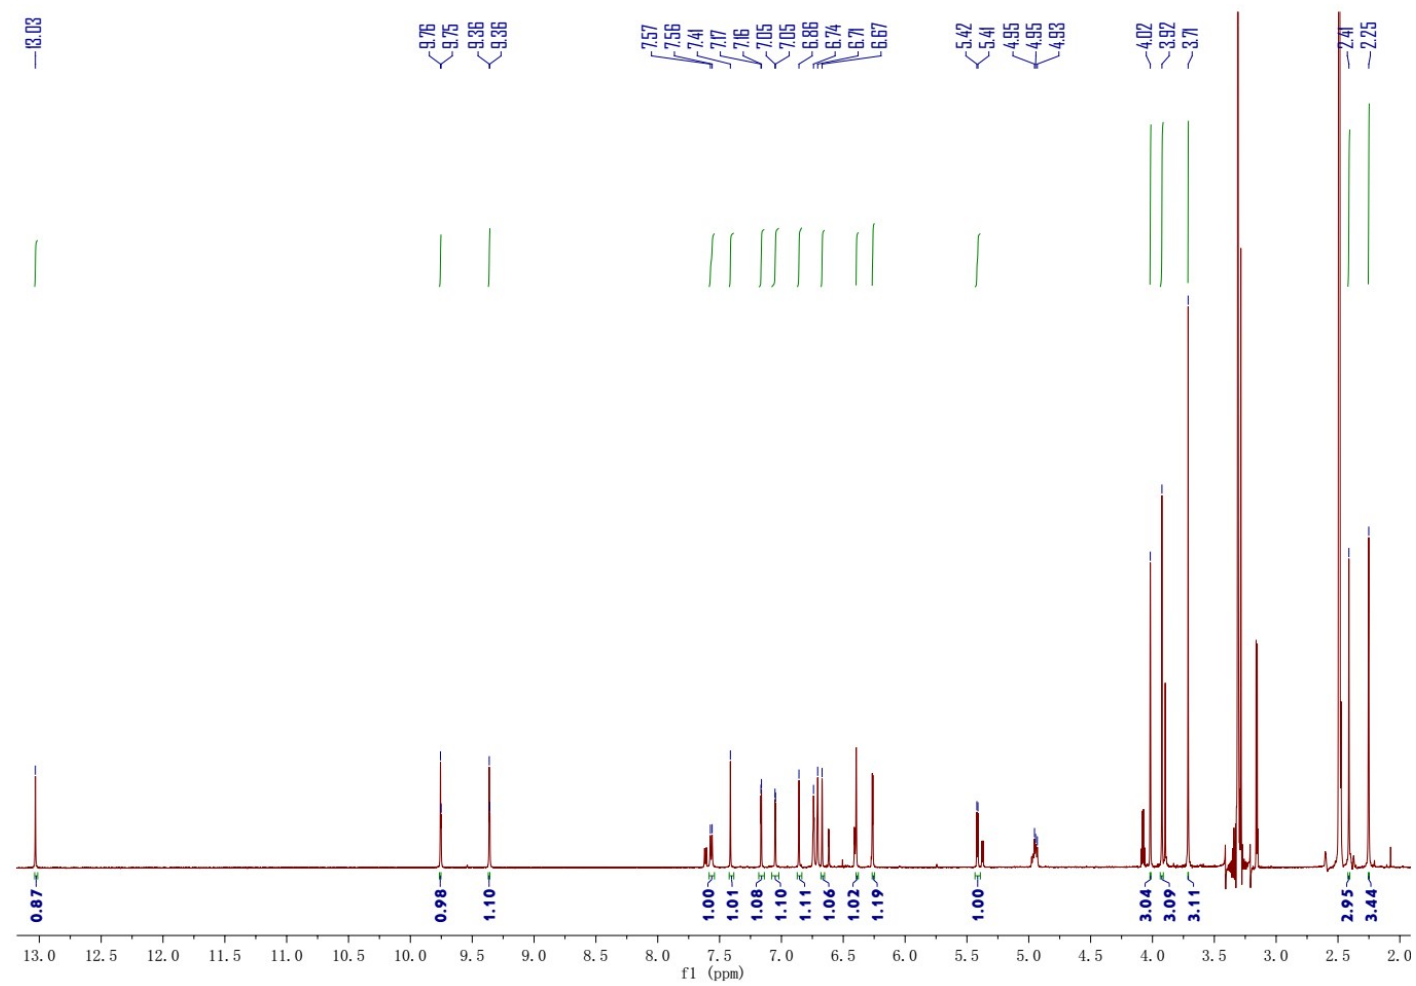

**Figure S4.**  $^{13}\text{C}$  NMR spectrum of ( $\pm$ )-ascomlactone A in DMSO (150 MHz).

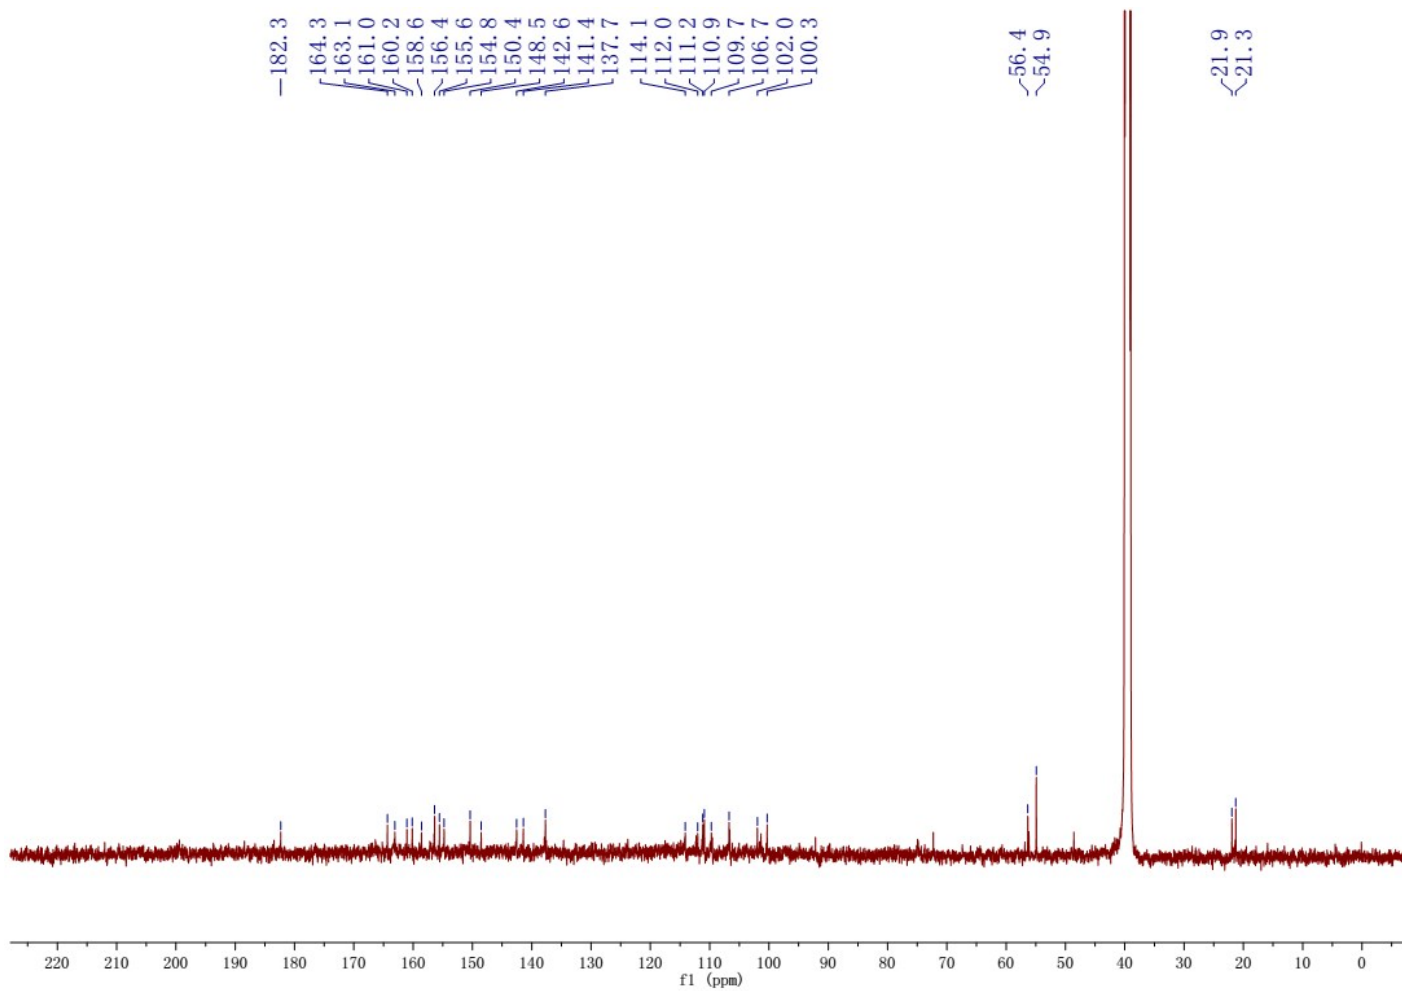

**Figure S5.** DEPT-90° spectrum of (±)-ascomlactone A in DMSO (150 MHz).

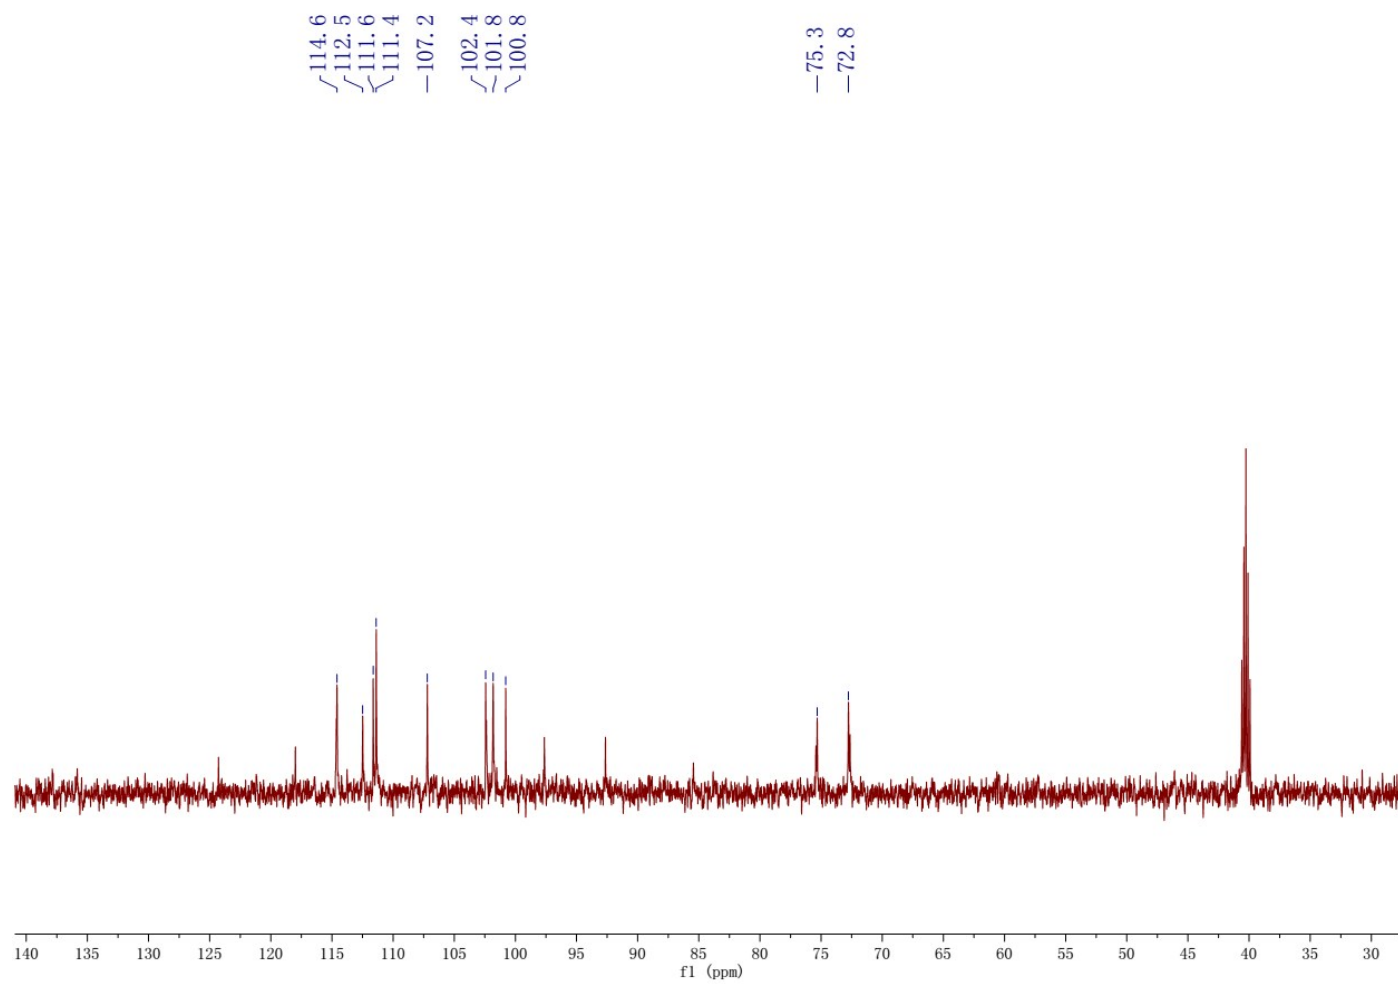



**Figure S6.** DEPT-135° spectrum of (±)-ascomlactone A in DMSO (150 MHz).

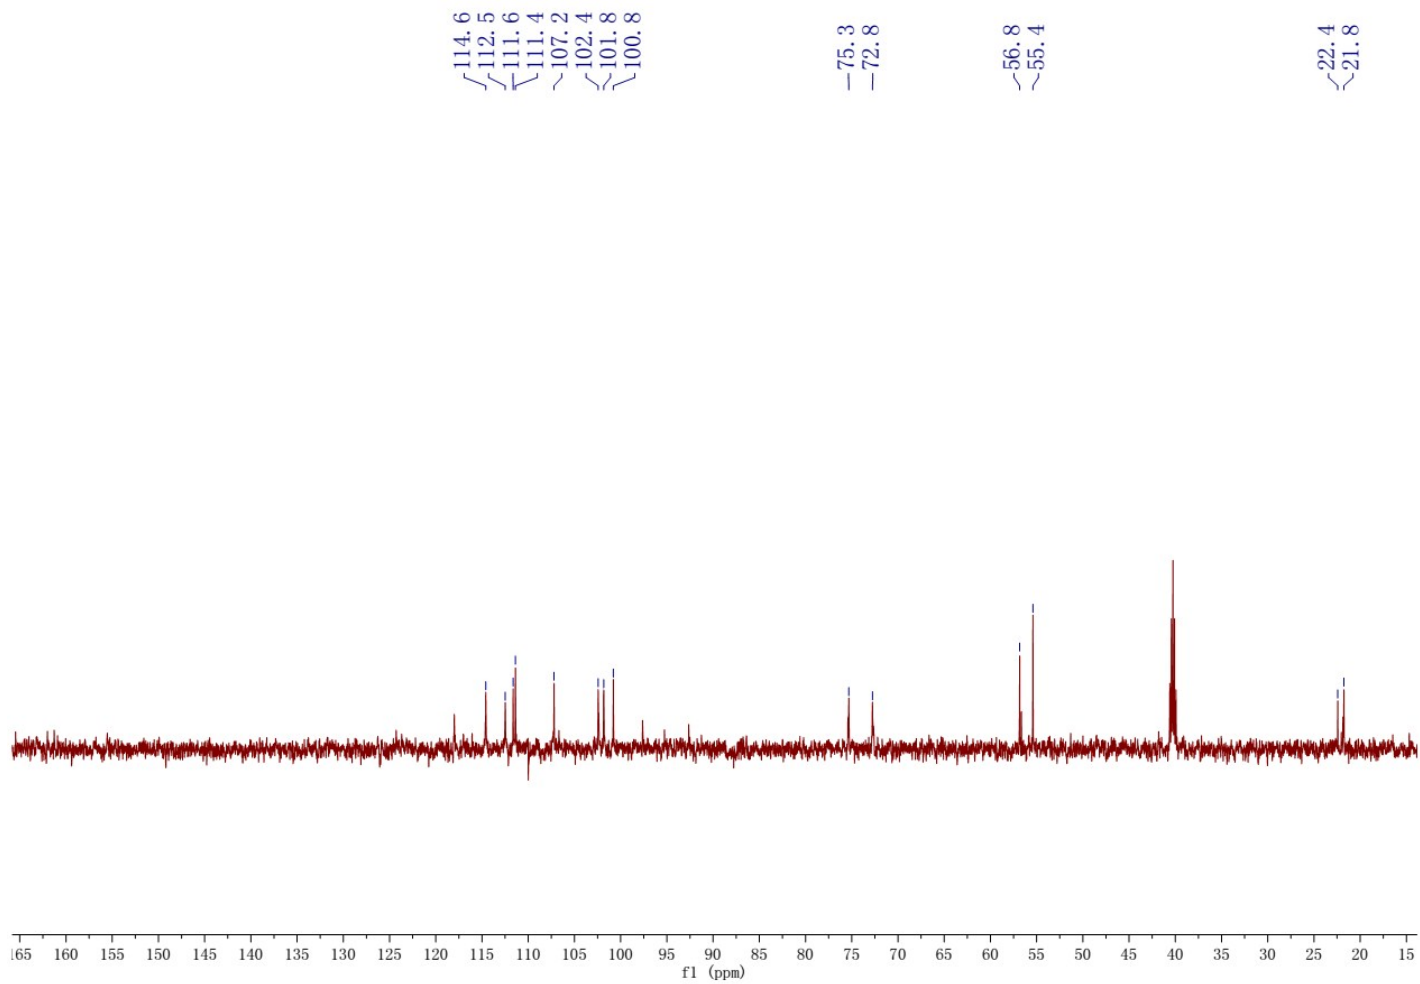

**Figure S7.**  $^1\text{H}$ - $^1\text{H}$  COSY spectrum of ( $\pm$ )-ascomlactone A in DMSO (600 MHz).

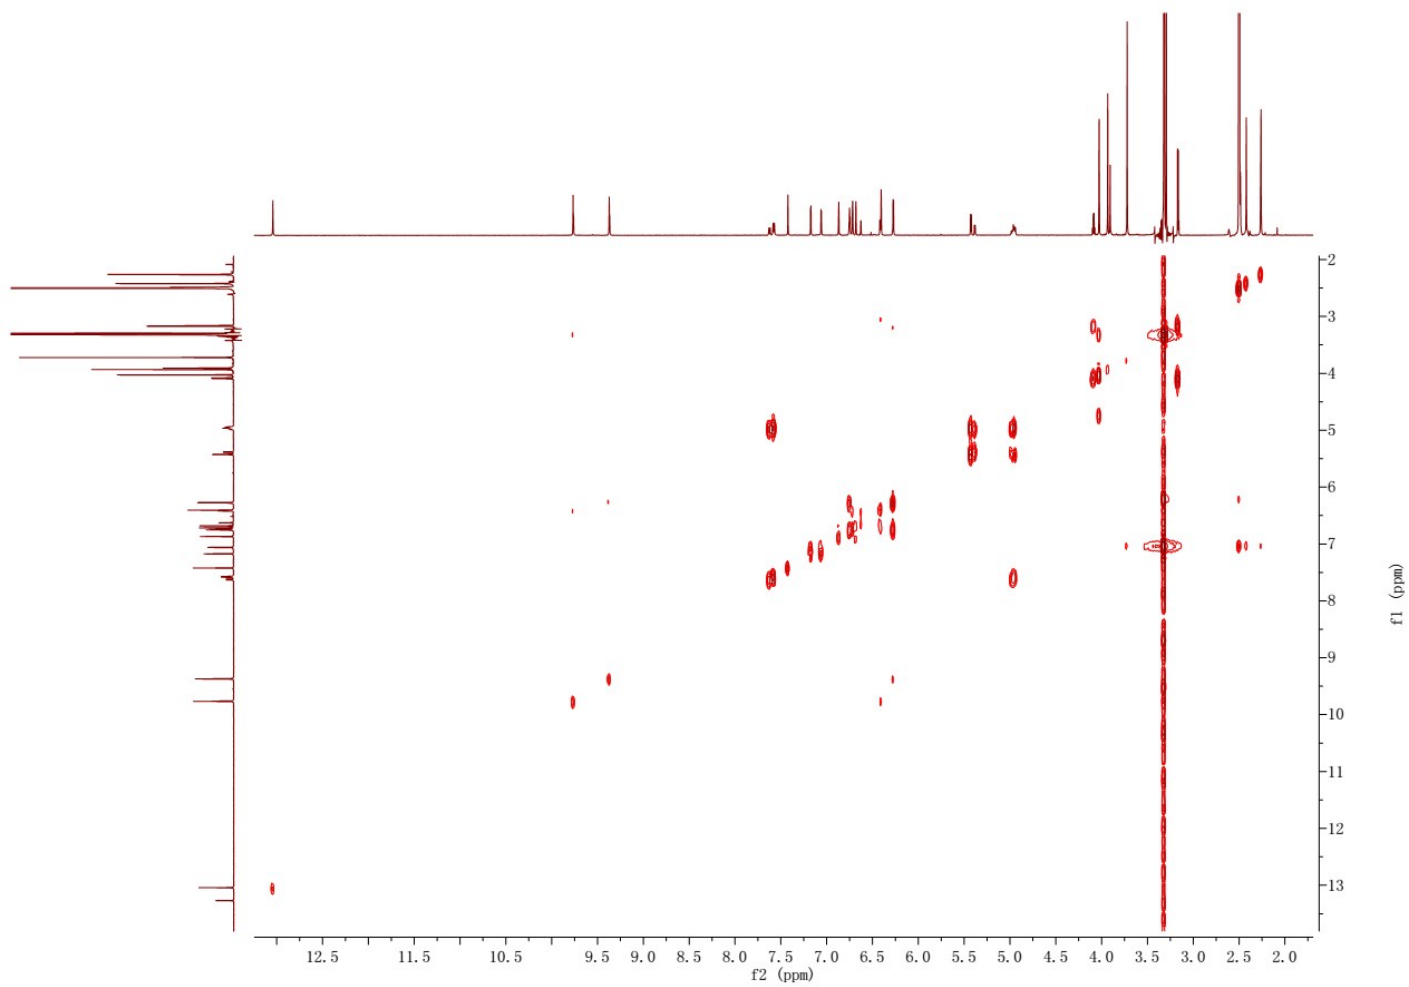

**Figure S8.** HSQC spectrum of ( $\pm$ )-ascomlactone A in DMSO (600 MHz).

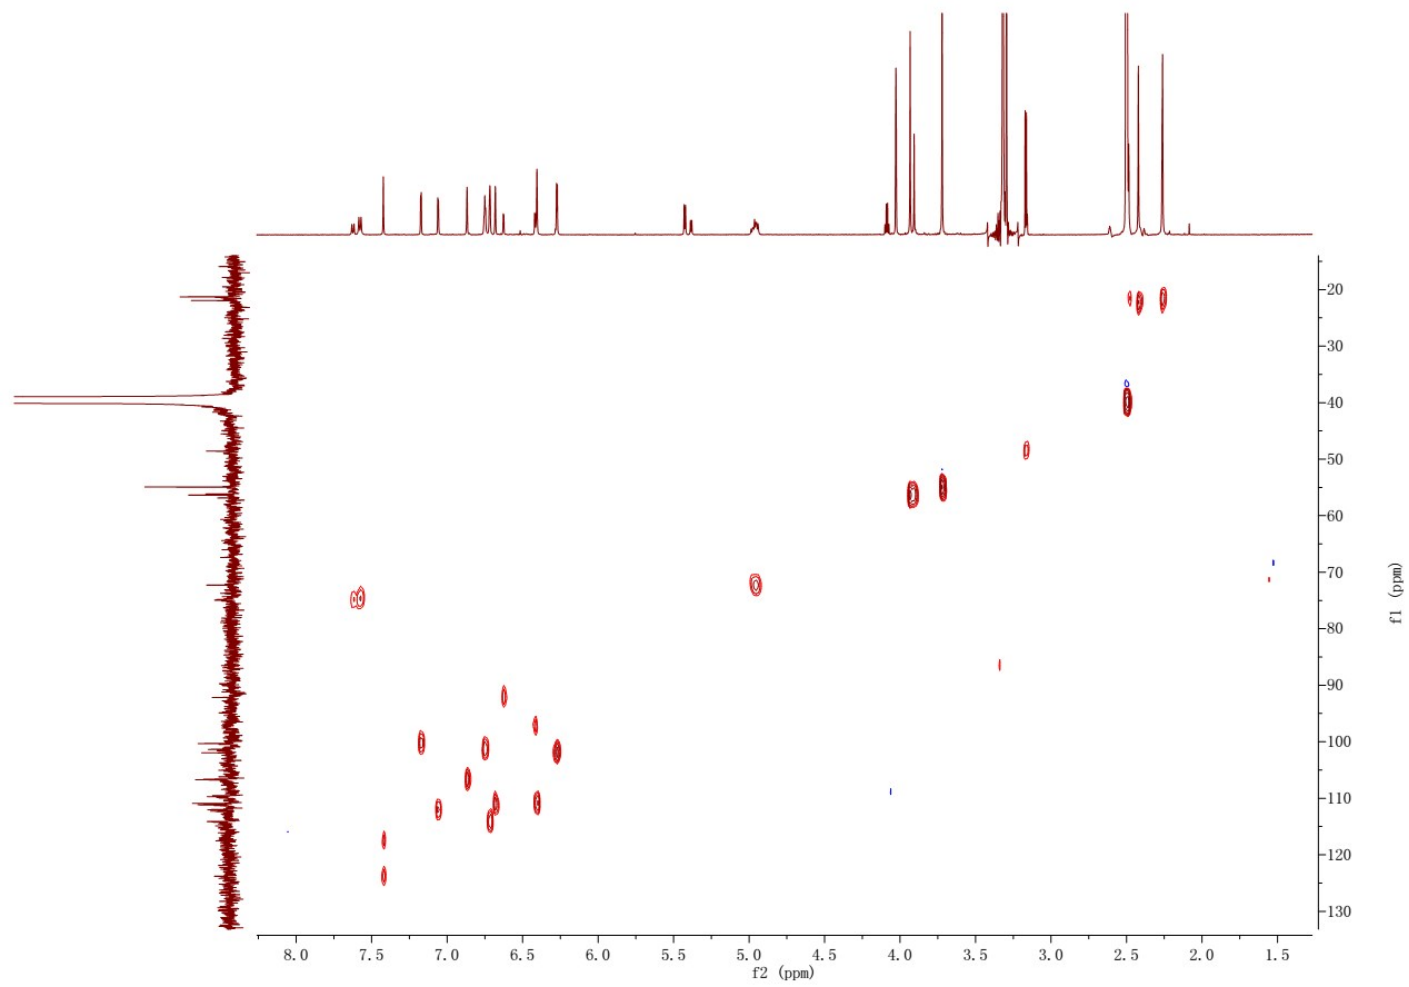

**Figure S9.** HMBC spectrum of ( $\pm$ )-ascomlactone A in DMSO (600 MHz).

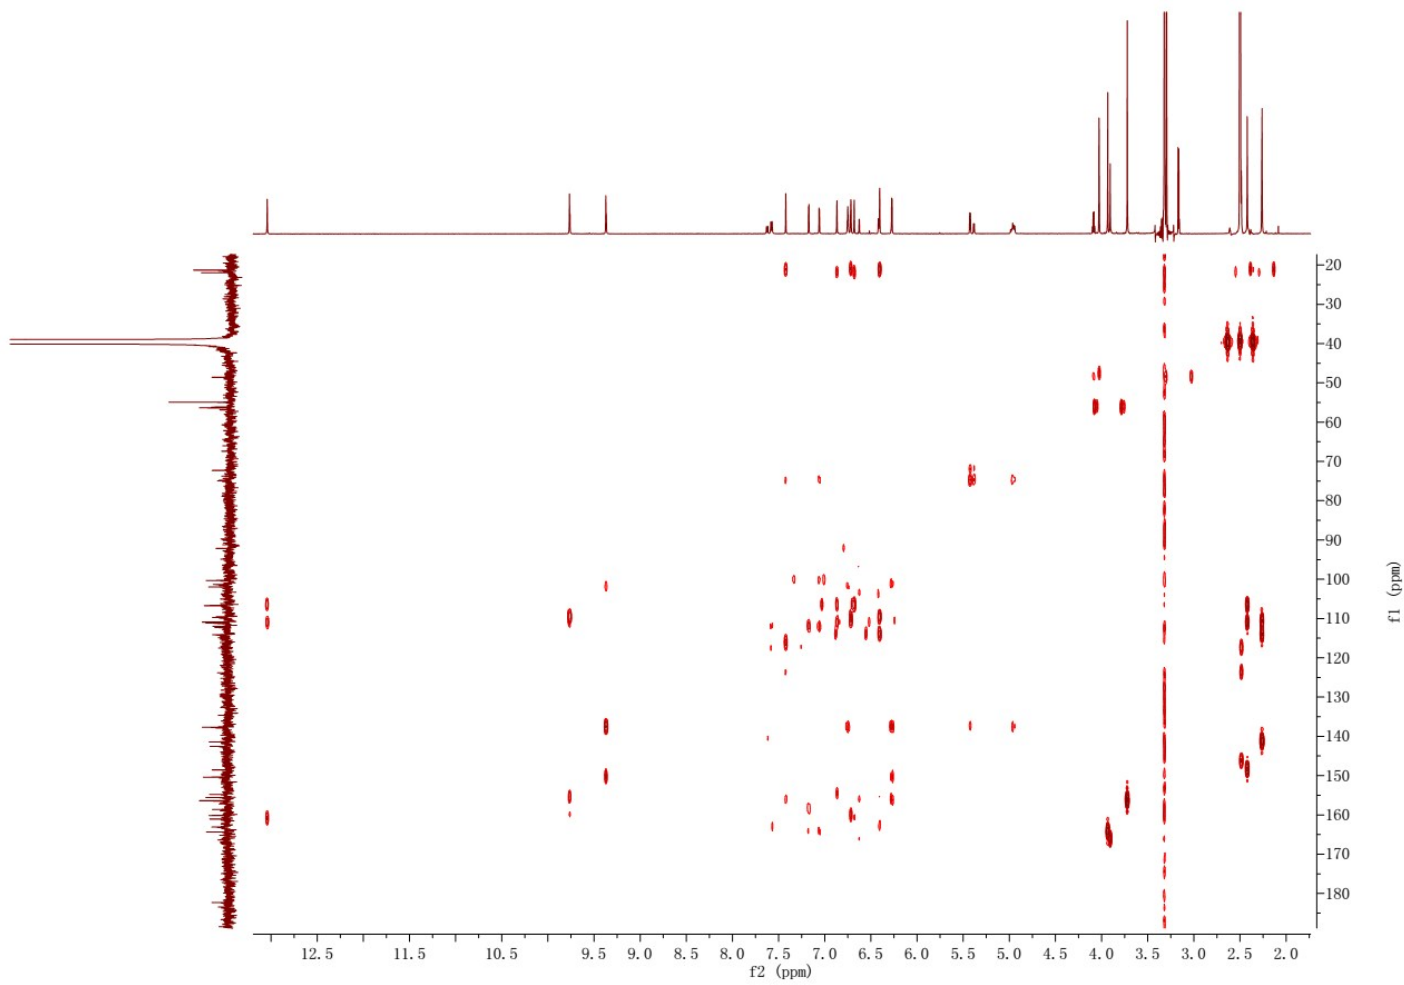

**Figure S10.** HRESI TOF MS spectrum of (±)-ascomlactone A.

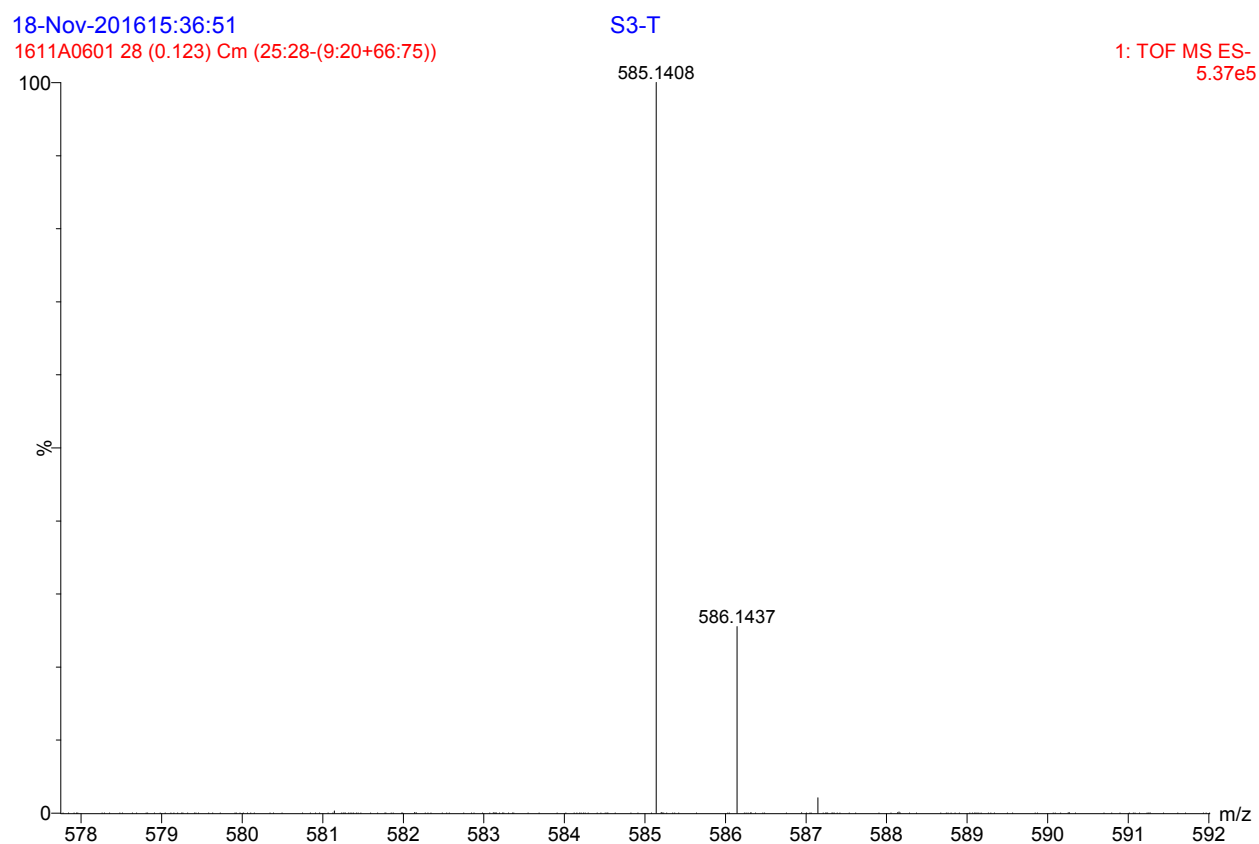

| Mass     | Calc. Mass | mDa | PPM | DBE  | i-FIT | Norm | Conf(%) | Formula     |
|----------|------------|-----|-----|------|-------|------|---------|-------------|
| 585.1408 | 585.1397   | 1.1 | 1.9 | 20.5 | 222.1 | n/a  | n/a     | C32 H25 O11 |

Elemental Composition Report

1. Monoisotopic Mass

2. Elements Used: C: 0-40 H: 0-100 O: 0-20

3. Tolerance = 5.0 PPM

**Figure S11.** HPCL spectrum of ( $\pm$ )-ascomlactone A: C<sub>18</sub> column (250  $\times$  10 mm, 5  $\mu$ m); 85% MeOH/H<sub>2</sub>O; flow rate; 1.5 mL/min.

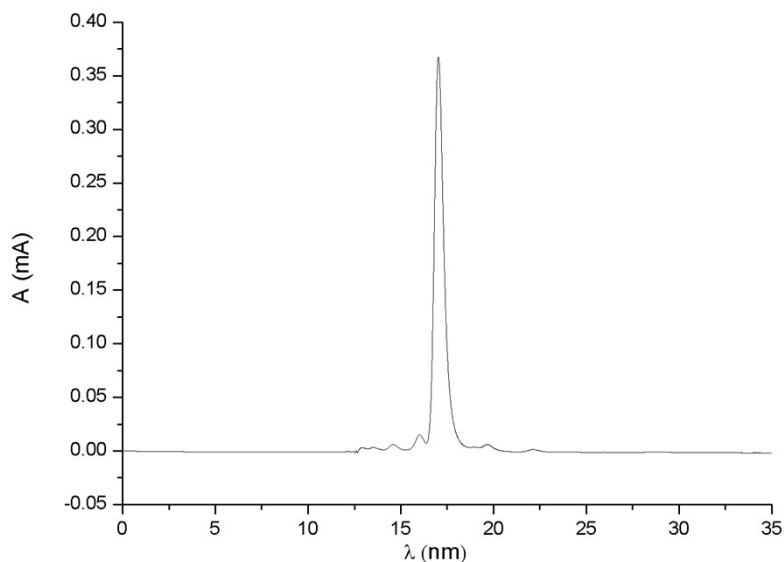

**Figure S12.** HPLC chiral separation spectrum of (+)-ascomlactone A (**1a**) and (-)-ascomlactone A (**1b**): cellulose-2 (250  $\times$  10 mm, 5  $\mu$ m); 95% MeOH/H<sub>2</sub>O; flow rate; 1.0 mL/min. (RT 25.2min with a integration 54.8; RT 28.4 min with a integration 26.1)

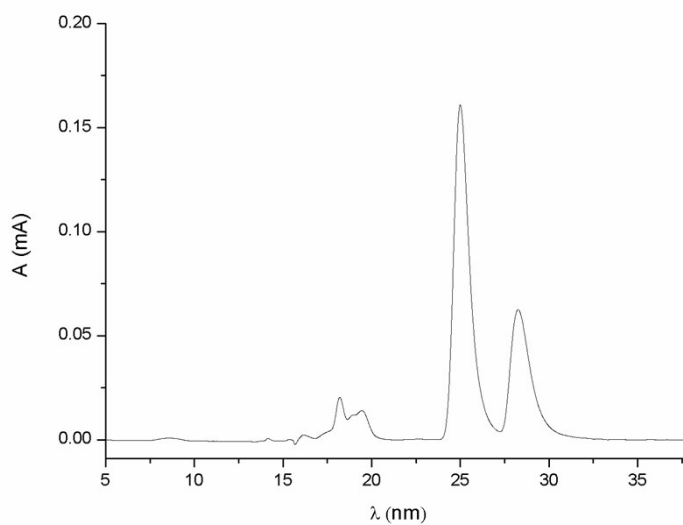

**Figure S13.** LC-MS of the extract of *Ascomycota* sp. (top), the purified (+)-1 (middle) and the ESI-MS spectrum of THE peak at RT 4.9 min.

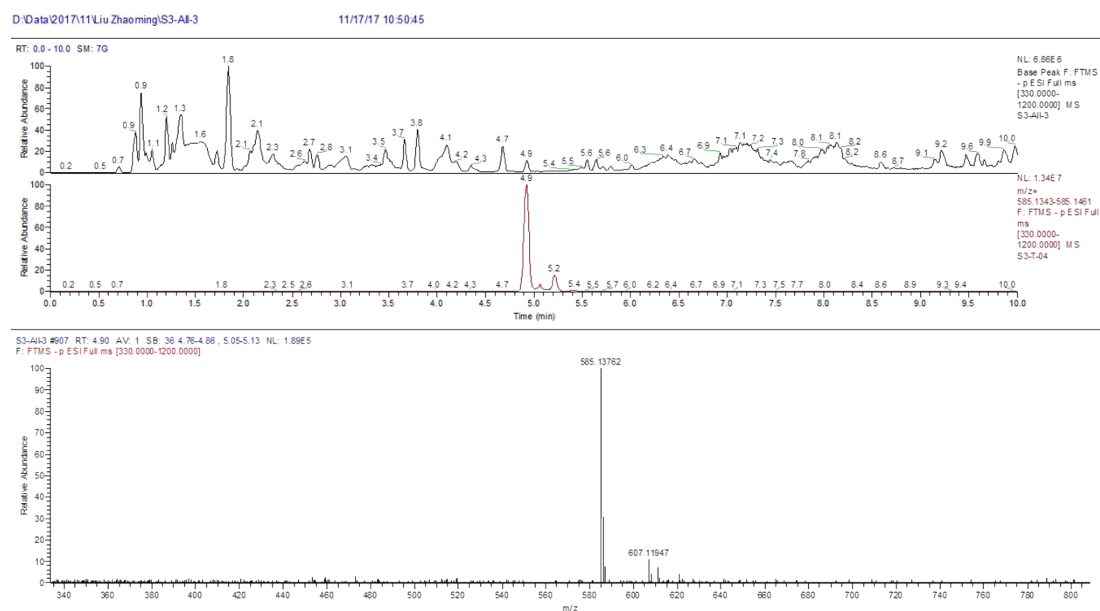

Supplement: c7ob02707a1.pdf [file c7ob02707a1.pdf]
